# Supplementary material for: From isolated 1H-pyrazole cryptand anion receptors to hybrid inorganic–organic 1D helical polymeric anion receptors
Source: Royal Society of Chemistry journal article supplement (doi:10.1039/c5dt00763a), 2015-01-01
Supplement: c5dt00763a1.pdf [file c5dt00763a1.pdf]

## From Isolated *1H*-Pyrazole Cryptand Anion Receptors to Hybrid Inorganic-Organic 1D Helical Polymeric Anion Receptors.

*Javier Pitarch-Jarque, Raquel Belda, Laura García-España, José M. LLinares, FangFang Pan, Kari Rissanen, Pilar Navarro and Enrique García-España.\**

### Supplementary Information.

**Pages 3.** Synthesis.

**Pages 4.** Experimental section.

**Page 6. Table S1.** Crystallographic data for complexes **4** and **5**.

**Page 7. Table S2.** Hydrogen Bonding Contacts for **4**.

**Page 7. Figure S1.** Views of **3** showing the encapsulated molecules and their surroundings. Hydrogen bonds are represented by dotted lines.

**Page 8. Figure S2.** Stability constants for the Cl<sup>-</sup> complexes of receptor **1** determined in 0.15 mol dm<sup>-3</sup> NaTFMS at 298.1 K

**Page 8. Table S3.** Stability constants for Cl<sup>-</sup> complexes of receptor **1** determined in 0.15 mol dm<sup>-3</sup> NaTFMS at 298.1 K

**Page 8. Figure S3.** a) Plot of the distribution diagram of the system **1** : Cl<sup>-</sup> in 1:1 molar ratio (charges omitted). b) Plot of log K<sub>eff</sub> vs. pH.

**Page 9. Scheme S1.** Assignment of <sup>1</sup>H NMR signals of **1**.

**Page 10. Figure S4.** a) <sup>1</sup>H NMR (400 MHz, CD<sub>3</sub>OD) spectrum of **1**. b) COSY spectrum of **1** and c) HSQC spectrum of **1**.

**Page 11. Figure S5.** <sup>1</sup>H NMR titration of **1** with Cl<sup>-</sup> in D<sub>2</sub>O at pH=2. Numbers at the left side indicate the equivalent amounts of Cl<sup>-</sup> added.

**Page 11. Figure S6.** Job plot of compound **1** in the presence of Cl<sup>-</sup> in D<sub>2</sub>O at 303 K. Total concentration [1+Cl] = 5 mM.

**Page 12. Figure S7.** <sup>19</sup>F NMR titration of **1** in the presence of F<sup>-</sup> in D<sub>2</sub>O at pH=2. Numbers at the left side indicate the 1:F<sup>-</sup> molar ratios.

**Page 13. Figure S8.**  $^{19}\text{F}$  NMR titration of the complex  $[\mathbf{1}:\text{F}]$  (in 1:1 molar ratio) in the presence of  $\text{Cl}^-$  in  $\text{D}_2\text{O}$  at  $\text{pH}=2$ . Numbers at the left side indicate the  $\mathbf{1}:\text{F}:\text{Cl}^-$  molar ratios.

**Page 14. Figure S9.** MALDI-TOF spectrum of aqueous solution of **4** at  $\text{pH}=2$ .

**Page 14. Figure S10.** MALDI-TOF spectrum of aqueous solution of **5** at  $\text{pH}=1.5$ .

**Page 15. Figure S11.** MALDI-TOF spectrum of **5** in the  $m/z = 1500 - 1850$  range.

**Page 15. Figure S12.** Simulated (top) and experimental (bottom) MALDI-TOF spectrum of peaks for  $[\text{K}(\text{Cu}_2\text{H}_9\text{L}_2)\text{Cl}_{13}]^+$ .

**Page 16. Figure S13.** Simulated (top) and experimental (bottom) MALDI-TOF spectrum of peaks for  $[\text{Na}(\text{Cu}_2\text{H}_6\text{L}_2)\text{Cl}_8]^+$ .

**Page 17. Figure S14.** Simulated (top) and experimental (bottom) MALDI-TOF spectrum of peaks for  $[(\text{Cu}_2\text{H}_{12}\text{L}_2)\text{Cl}_{13}]^+$ .

**Page 18. Figure S15.** IR spectrum of **4** in KBr.

**Page 19. Figure S16.** IR spectrum of **5** in KBr.

**Page 20. Figure S17.** Thermogravimetric analysis (TGA) and Differential thermal analysis (DTA) of **5**.

**Page 21.** References.

## Synthesis.

### Synthesis and characterization of **1**.

The cryptand **1** was prepared as previously reported.<sup>1</sup> 3,5-Pyrazoledicarbaldehyde (0.375 g, 3 mmol) was dissolved in warm methanol (120 mL) and added drop wise during 2 h under an argon atmosphere to a stirred solution of tris(2-aminoethyl)amine (0.292 g, 2 mmol) in methanol (80 mL). After stirring overnight at room temperature, sodium borohydride (228 mg, 6 mmol) was added portion wise, and after 2 h the solvent was evaporated to dryness under reduced pressure. The residue was directly recrystallized from water (15 mL).

Yield (0.380 g, 65%); mp 245 °C. <sup>1</sup>H NMR (400 MHz, CD<sub>3</sub>OD): δ 5.85 (s, 3 H, H<sub>4</sub>), 3.72 (s, 12 H, H<sub>6</sub>), 2.80-2.83 (m, 12 H, H<sub>α</sub>), 2.68-2.71 (m, 12 H<sub>β</sub>). <sup>13</sup>C NMR (100.58 MHz, CD<sub>3</sub>OD): δ 147.92 (br s, C<sub>3,5</sub>), 103.28 (C<sub>4</sub>), 52.86 (C<sub>β</sub>), 48.54 (C<sub>α</sub>), 46.47 (C<sub>6</sub>). FAB-MS (m/z, %): 569 [M + H]<sup>+</sup> (60), 307 (17), 154 (100), 136 (83). Anal. Calcd (%) for C<sub>27</sub>H<sub>48</sub>N<sub>14</sub>, H<sub>2</sub>O (586.8): C, 55.27; H, 8.59; N, 33.42. Found: C, 55.42; H, 8.91; N, 33.70.

### Synthesis of the complexes **4** and **5**.

**[H<sub>6</sub>(1)Cl(H<sub>2</sub>O)<sub>2</sub>]Cl<sub>5</sub>·6 H<sub>2</sub>O (**4**)**. Working under argon atmosphere, a solution of **1** (10 mg, 17 mmol) in water (2 mL) was acidified with hydrochloric acid until pH = 2. A slow evaporation of the solution in a vessel afforded the formation of colorless crystals suitable for X-ray diffraction in 95% yield. Anal. Calcd. for C<sub>27</sub>H<sub>70</sub>Cl<sub>6</sub>N<sub>14</sub>O<sub>8</sub>: C, 34.90; H, 7.59; N, 21.11. Found: C, 34.8; H, 7.7; N, 21.1

**(5H<sub>2</sub>O, 2Cl@[Cu<sub>3</sub>(H<sub>6</sub>1)<sub>2</sub>Cl<sub>9</sub>]) Cl<sub>7</sub>·14.25H<sub>2</sub>O (**5**)**: Working under argon atmosphere, a solution of Cu(ClO<sub>4</sub>)<sub>2</sub>·6H<sub>2</sub>O (9.45 mg, 25.5 mmol) in water (2 mL) was added with stirring to a solution of **1** (10 mg, 17 mmol) in 2 mL in water acidified with HCl acid until pH 4. The blue solution was adjusted to pH = 1.5 with a concentrated solution of HCl. The pale green solution formed by means of a slowly evaporation at room temperature, affords green crystals in 95% yield. Anal. Calcd. for C<sub>54</sub>H<sub>149.5</sub>Cl<sub>18</sub>Cu<sub>3</sub>N<sub>28</sub>O<sub>20.75</sub>: C, 27.68; H, 6.43; N, 16.74. Found: C, 27.4; H, 6.6; N, 16.5.

## Experimental Section.

### X-Ray Analysis

A single crystal of **4** was measured in an Enraf Nonius KappaCCD using MoK $\alpha$  radiation ( $\lambda = 0.71073$  Å) at 293 K. A single crystal of **5** was measured in an Oxford diffraction Supernova diffractometer using CuK $\alpha$  ( $\lambda = 1.5418$  Å) radiation at 123 K. Structures were solved by direct methods using SIR97<sup>2</sup> and refined by full-matrix least-squares on all F<sup>2</sup> using SHELXL97<sup>3</sup> with the Olex2<sup>4</sup> suite. Molecular drawings were produced with Mercury.<sup>5</sup>

Compound **5** contains voids with scattered electron density which could not be modelled and was treated with the solvent masking protocol inside Olex2. The electron count / cell is 62.4 and it could be assigned to 6 water molecules. For more details see \_smtbx\_masks\_special\_details at the end of the cif file.

Cifs of **4** and **5** are deposited in CCDC with numbers 1030676 and 983275. These data can be obtained free of charge from The Crystallographic Data Centre via [www.ccdc.cam.ac.uk/data\\_request/cif](http://www.ccdc.cam.ac.uk/data_request/cif).

### Electromotive Force Measurements.

The potentiometric titrations were carried out at 298.1±0.1 K using NaCl 0.15 M as supporting electrolyte. The experimental procedure (burette, potentiometer, cell, stirrer, microcomputer, etc.) has been fully described elsewhere.<sup>6</sup> The acquisition of the emf data was performed with the computer program PASAT.<sup>7</sup> The reference electrode was an Ag/AgCl electrode in saturated KCl solution. The glass electrode was calibrated as an hydrogen-ion concentration probe by titration of previously standardized amounts of HCF<sub>3</sub>SO<sub>3</sub> with CO<sub>2</sub>-free NaOH solutions and determining the equivalent point by the Gran's method,<sup>8</sup> which gives the standard potential, E<sup>o</sup>, and the ionic product of water (pK<sub>w</sub> = 13.73(1)).

The computer program HYPERQUAD<sup>9</sup> was used to fit the protonation and stability constants. Solutions containing the ligand and the ligand + NaCl, with concentrations 1 x 10<sup>-3</sup> M were titrated with NaOH. The different titration curves for each ligand were treated as separated curves without significant variations in the values of the stability constants. Finally, the sets of data were merged together and treated simultaneously to give the final stability constants.

### MALDI-TOF spectrometry

#### -Sample preparation

The samples of **4** and **5** were prepared in water with a final concentration 1x 10<sup>-3</sup> M. The sample was dissolved in water at acidic pH. 1 µL of sample spotted onto the MALDI plate, after the droplets were air-dried at room temperature 0.75 µL of sample matrix was spotted and allowed to dry. Matrix (5 mg/mL CHCA (Bruker) in 0.1% TFA-ACN/H<sub>2</sub>O (7:3, v/v).

### **Mass spectrometry analysis**

The resulting mixtures were analyzed in a 5800 MALDI TOFTOF (ABSciex) in reflector linear mode (3000 shots every position) in a mass range of 350-35000 m/z; and in linear mode in a mass range of 3500-25000 Da.

Previously, the Plate and the acquisition method were calibrated with 1  $\mu$ L the TOFTOF calibration mixture (ABSciex), in 13 positions. Only the reflector mode gives signal. The analysis was carried out in the SCSIE-University of Valencia Proteomics Unit, a member of ISCIII ProteoRedProteomics Platform”.

### **NMR Measurements.**

The  $^1\text{H}$  and  $^{13}\text{C}$  NMR spectra were recorded on a Bruker Advance DPX 400 MHz spectrometer operating at 399.95 MHz for  $^1\text{H}$  and at 100.58 MHz for  $^{13}\text{C}$ .  $^{19}\text{F}$  spectra were recorded on a DPX 500 Bruker spectrometer operating at 470.47MHz.  $^1\text{H}$ -NMR studies were done in  $\text{D}_2\text{O}$  using 3-(Trimethylsilyl) propionic acid sodium salt as a reference standard ( $\delta = 0$  ppm for  $^1\text{H}$  and  $\delta = 1.7$  ppm for  $^{13}\text{C}$ ). Adjustments to the desired pH were made using drops of trifluoromethanesulfonic acid or NaOD solutions. The pD was calculated from the measured pH values using the correlation,  $\text{pH} = \text{pD} - 0.4$ .<sup>10</sup>

## X-Ray Analysis

**Table S1.** Crystallographic data for complexes **4** and **5**.

| <b>Compound</b>                        | <b>4</b>                                                                       | <b>5</b>                                                                                             |
|----------------------------------------|--------------------------------------------------------------------------------|------------------------------------------------------------------------------------------------------|
| <b>Empirical formula</b>               | C <sub>27</sub> H <sub>70</sub> Cl <sub>6</sub> N <sub>14</sub> O <sub>8</sub> | C <sub>216</sub> H <sub>484</sub> Cl <sub>72</sub> Cu <sub>12</sub> N <sub>112</sub> O <sub>77</sub> |
| <b>Formula weight</b>                  | 931.67                                                                         | 2346.07                                                                                              |
| <b>Temperature</b>                     | 293.0(2) K                                                                     | 123.0(1) K                                                                                           |
| <b>Crystal system</b>                  | Monoclinic                                                                     | Monoclinic                                                                                           |
| <b>Space group</b>                     | P 21/c                                                                         | P 21/c                                                                                               |
| <b>Unit cell dimensions</b>            |                                                                                |                                                                                                      |
| <b>a(Å)</b>                            | 14.1190(8)                                                                     | 20.6746(7)                                                                                           |
| <b>b(Å)</b>                            | 15.1510(5)                                                                     | 18.6770(3)                                                                                           |
| <b>c(Å)</b>                            | 24.8700(11)                                                                    | 40.0092(14)                                                                                          |
| <b>α(°)</b>                            | 90                                                                             | 90                                                                                                   |
| <b>β(°)</b>                            | 121.047(2)                                                                     | 132.674(6)                                                                                           |
| <b>γ(°)</b>                            | 90                                                                             | 90                                                                                                   |
| <b>Volume Å<sup>3</sup></b>            | 4558.0(4)                                                                      | 11358.5(10)                                                                                          |
| <b>Z</b>                               | 4                                                                              | 1                                                                                                    |
| <b>Density calc (g/cm<sup>3</sup>)</b> | 1.358                                                                          | 1.345                                                                                                |
| <b>Crystal size (mm)</b>               | 0.3 × 0.2 × 0.2                                                                | 0.35 × 0.17 × 0.06                                                                                   |
| <b>Wavelength</b>                      | 0.71073                                                                        | 1.5418                                                                                               |
| <b>F(000)</b>                          | 1984                                                                           | 4752                                                                                                 |
| <b>μ (mm<sup>-1</sup>)</b>             | 0.435                                                                          | 5.084                                                                                                |
| <b>Absorption. correction</b>          | None                                                                           | Multi-scan                                                                                           |
| <b>Θ range</b>                         | 1.91° to 25°                                                                   | 1.41° to 27.48°                                                                                      |
| <b>reflns collected</b>                | 14111                                                                          | 49666                                                                                                |
| <b>indep reflns</b>                    | 7709                                                                           | 20216                                                                                                |
| <b>R(int)</b>                          | 0.0579                                                                         | 0.024                                                                                                |
| <b>data/restr/param</b>                | 7709/38/530                                                                    | 20216/281/1254                                                                                       |
| <b>Final R indices</b>                 | R1 = 0.0626;                                                                   | R1 = 0.0975;                                                                                         |
| <b>[I &gt; 2 sigma(I)]</b>             | wR <sup>2</sup> = 0.1266;                                                      | wR <sup>2</sup> = 0.3214;                                                                            |
| <b>R indices all data</b>              | R1 = 0.1369;                                                                   | R1 = 0.1049;                                                                                         |
|                                        | wR <sup>2</sup> = 0.1711;                                                      | wR <sup>2</sup> = 0.3382;                                                                            |
| <b>GOF (F<sup>2</sup>)</b>             | 1.036                                                                          | 1.542                                                                                                |

**Table S2.** Hydrogen Bonding Contacts for **4**.

| D   | H    | A       | D-H     | D-H..A  | D-H..A   | Angle  |
|-----|------|---------|---------|---------|----------|--------|
| N2  | H2A  | Cl1     | 0.97    | 2.32    | 3.194(4) | 149.9  |
| N2  | H2B  | O7(#1)  | 0.97    | 1.83    | 2.773(5) | 164    |
| N7  | H7A  | Cl4     | 0.97    | 2.18    | 3.126(4) | 166.4  |
| N7  | H7B  | OW2     | 0.97    | 1.8     | 2.755(5) | 168.9  |
| N11 | H11A | Cl1     | 0.97    | 2.46    | 3.350(4) | 152.1  |
| N10 | H10A | Cl1     | 0.97    | 2.41    | 3.257(4) | 146.1  |
| N10 | H10B | Cl3     | 0.97    | 2.19    | 3.155(4) | 175.7  |
| N5  | H5A  | OW1     | 0.97    | 1.87    | 2.796(5) | 159.8  |
| N5  | H5B  | Cl4     | 0.97    | 2.2     | 3.155(4) | 166.5  |
| N14 | H14A | OW2     | 0.97    | 1.9     | 2.825(5) | 158    |
| N14 | H14B | OW1     | 0.97    | 2.56    | 3.051(5) | 111.1  |
| N14 | H14B | O5(#1)  | 0.97    | 1.85    | 2.777(5) | 157.8  |
| O7  | H7E  | Cl4     | 0.84    | 2.44    | 3.143(4) | 141.2  |
| O7  | H7F  | Cl3     | 0.77    | 2.34    | 3.104(4) | 173.9  |
| OW1 | HW1A | Cl3(#1) | 0.77    | 2.54    | 3.302(3) | 167    |
| OW1 | HW1B | Cl1     | 0.85    | 2.4     | 3.210(3) | 159.8  |
| OW2 | HW2A | Cl1     | 0.77    | 2.41    | 3.179(3) | 174.3  |
| O5  | H5C  | Cl3     | 0.77    | 2.44    | 3.199(4) | 166.6  |
| O9  | H9D  | Cl5     | 0.89    | 2.24    | 3.105(7) | 164    |
| O3  | H3D  | N8      | 0.86    | 2.04    | 2.886(6) | 165.3  |
| N9  | H9   | N3(#2)  | 0.95(7) | 2.00(7) | 2.943(6) | 171(6) |

Symmetry operations : (#1) = 1-x, y-1/2, -z; (#2) = 1-x, 1/2+y, 1/2-z

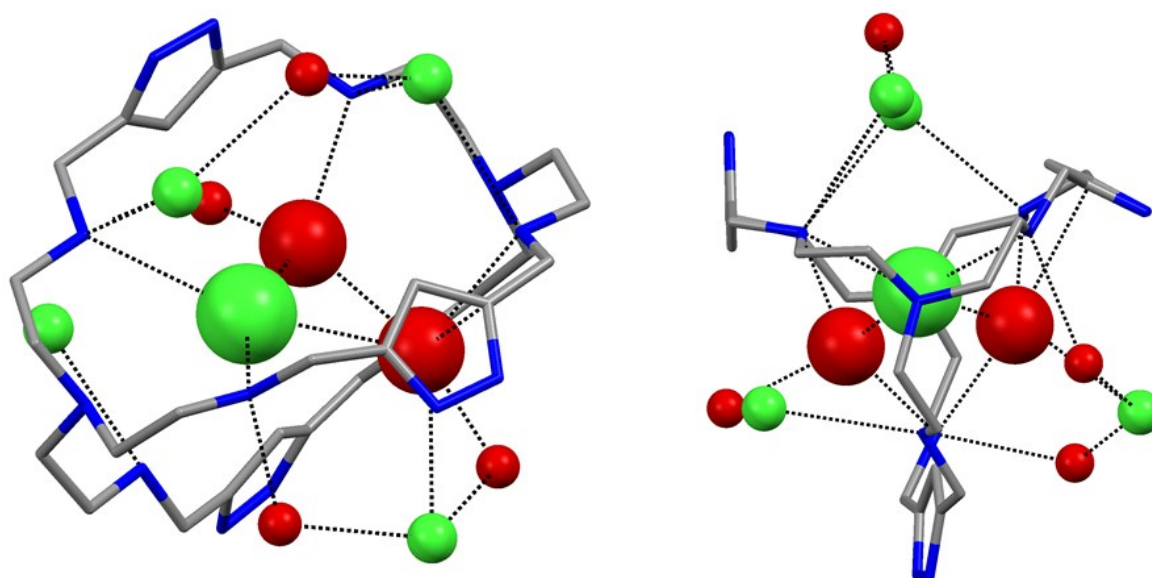**Figure S1.** Views of the coordination sphere of **4**. Hydrogen bonds represented by dotted lines.

## Electromotive Force Measurements.

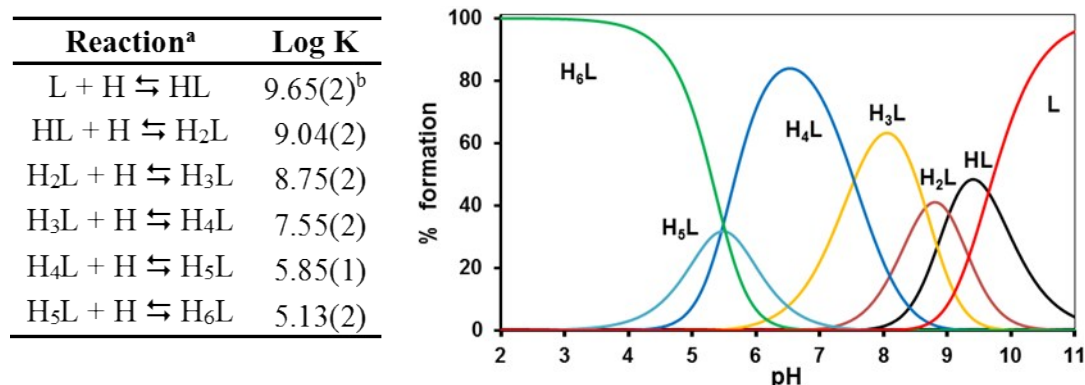

**Figure S2.** Stepwise protonation constants for receptor **1** determined in 0.15 mol dm<sup>-3</sup> NaTFMS at 298.1 K (<sup>a</sup> Charges omitted. <sup>b</sup> Values in parentheses are standard deviations in the last significant figure).

| Reaction <sup>a</sup>               | Log K                |
|-------------------------------------|----------------------|
| $H_2L + A \rightleftharpoons H_2LA$ | 2.58(4) <sup>b</sup> |
| $H_3L + A \rightleftharpoons H_3LA$ | 2.81(3)              |
| $H_4L + A \rightleftharpoons H_4LA$ | 3.47(2)              |
| $H_5L + A \rightleftharpoons H_5LA$ | 4.51(2)              |
| $H_6L + A \rightleftharpoons H_6LA$ | 4.83(2)              |

<sup>a</sup> Charges omitted. <sup>b</sup> Values in parentheses are standard deviations in the last significant figure.

**Table S3.** Stepwise stability constants for the complexes of receptor **1** with Cl<sup>-</sup> determined in 0.15 mol dm<sup>-3</sup> NaTFMS at 298.1 K

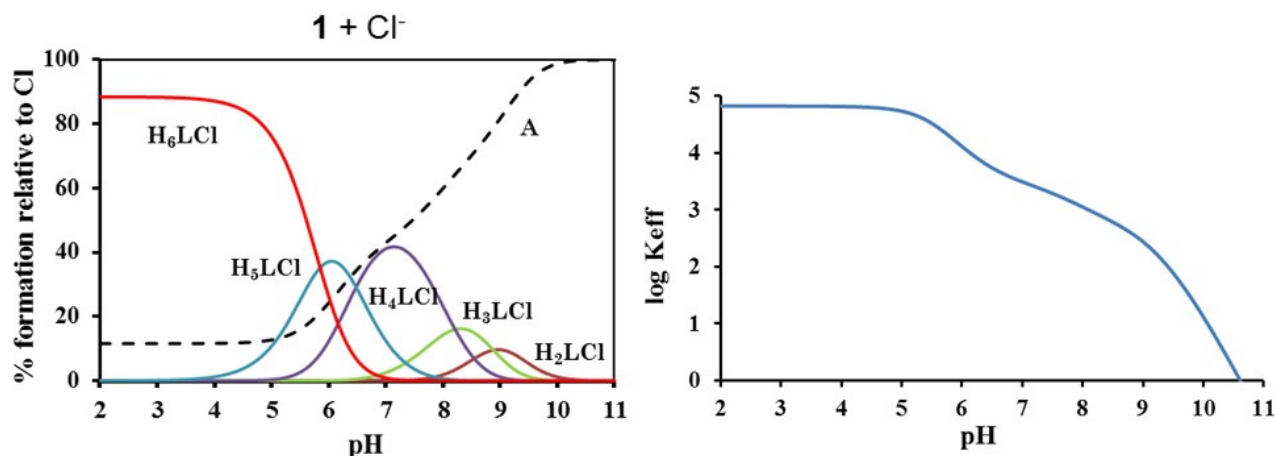

**Figure S3.** a) Plot of the distribution diagram of the system **1** : Cl in 1:1 molar ratio (charges omitted). b) Plot of log  $K_{\text{eff}}$  vs. pH.

The Effective constant ( $K_{\text{eff}}$ ) was calculated using the formulae:

$$K_{\text{eff}} = \frac{\sum [AH_{i+j}L]}{\sum [AH_i] \cdot \sum [H_jL]}$$



## NMR Measurements.

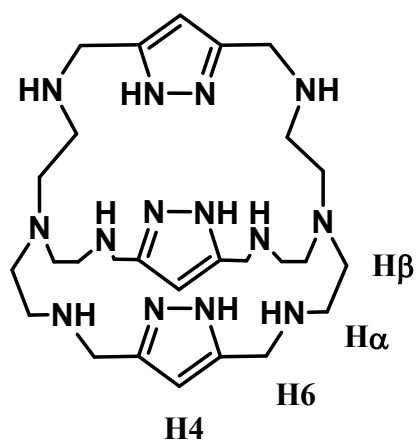

**Scheme S1.** Assignment of  $^1\text{H}$  NMR signals of **1**.

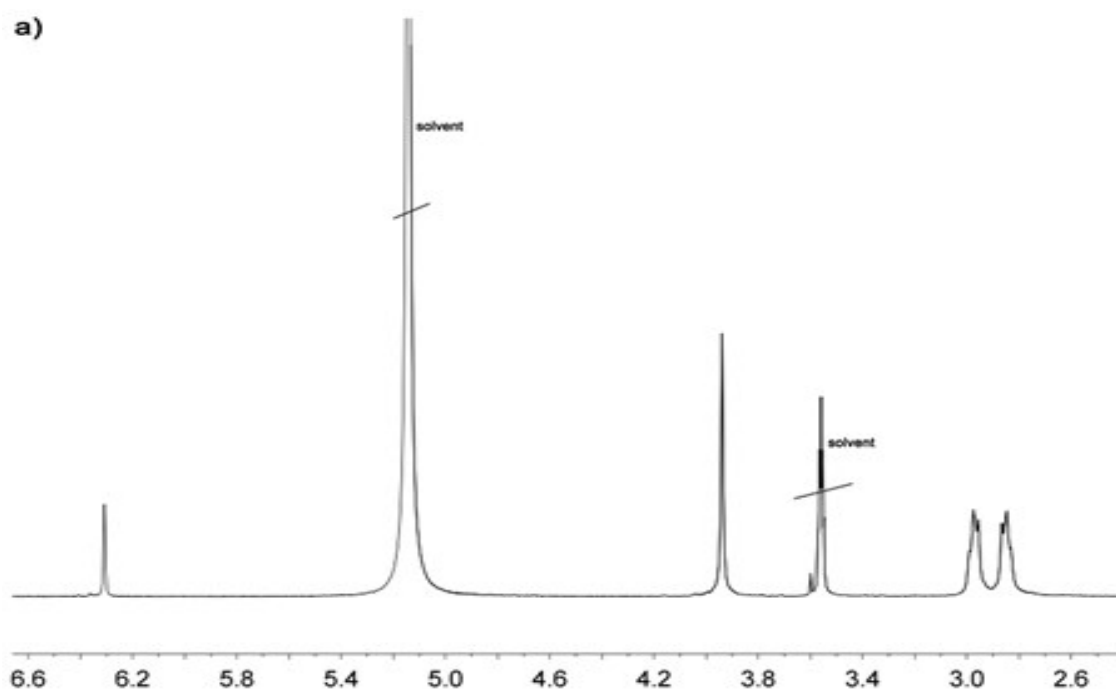

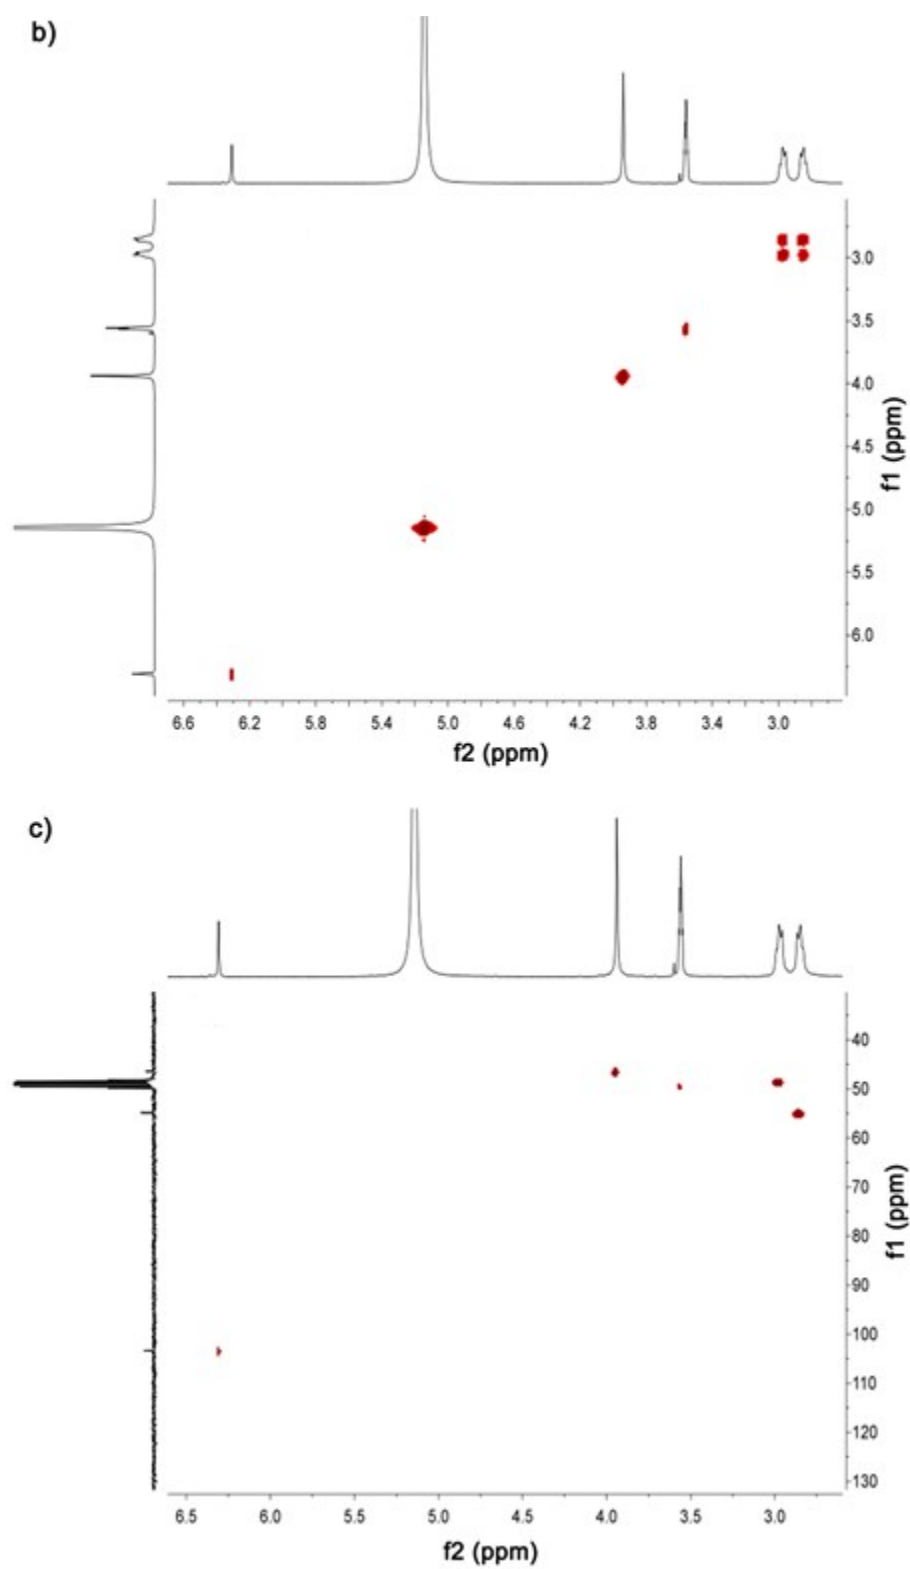

**Figure S4.** a)  $^1\text{H}$  NMR (400 MHz,  $\text{CD}_3\text{OD}$ ) spectrum of **1**. b) Cosy spectrum of **1** and c) HSQC spectrum of **1**.

### Chloride titration $^1\text{H}$ NMR experiments.

The study was done adding  $\text{Cl}^-$  amounts added to a solution of **1**. The spectra recorded are shown in figure S6. The pH and concentration of **1** were kept constant during the titration.

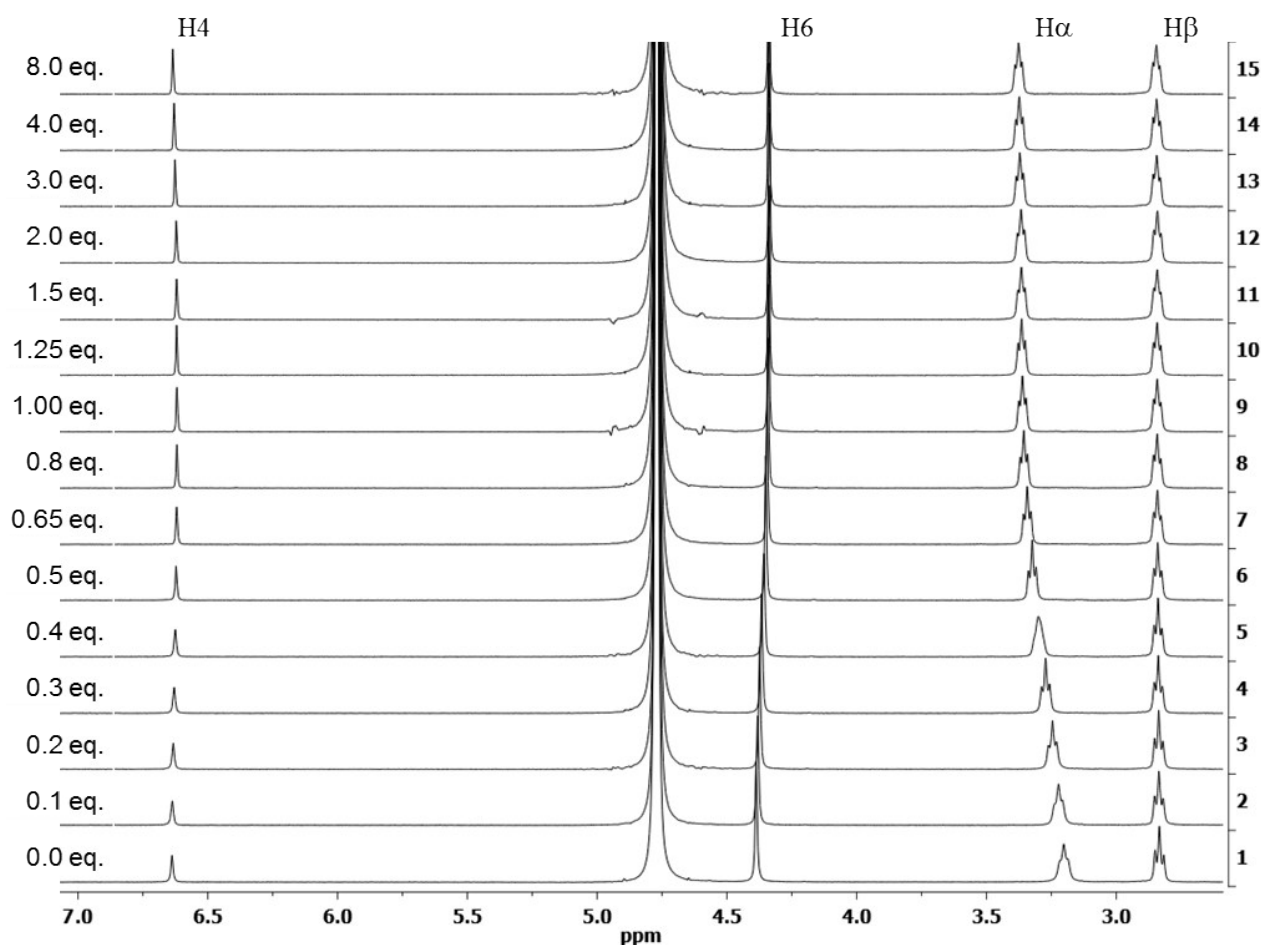

**Figure S5.**  $^1\text{H}$  NMR titration of **1** with  $\text{Cl}^-$  in  $\text{D}_2\text{O}$  at  $\text{pH}=2$ . Numbers at the left side indicate the equivalent amounts of  $\text{Cl}^-$  added.

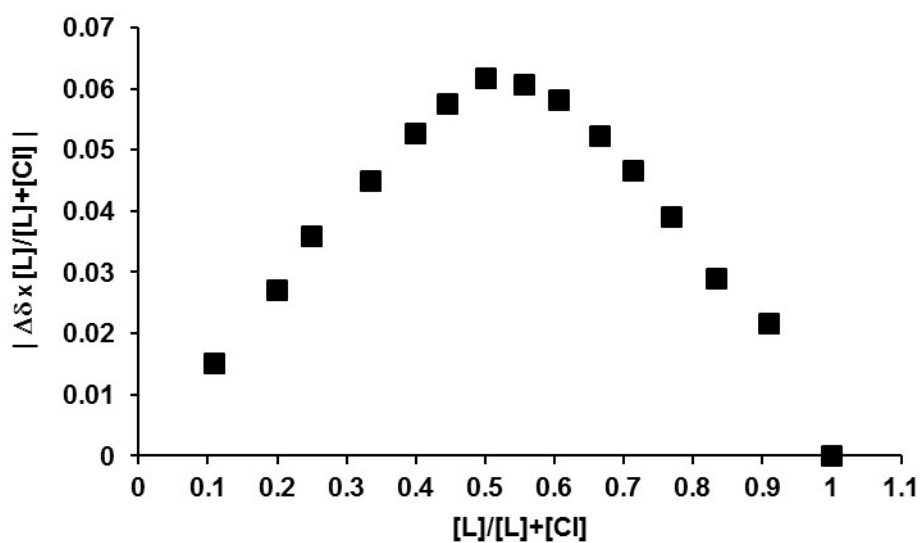

**Figure S6.** Job plot of compound **1** in the presence of  $\text{Cl}^-$  in  $\text{D}_2\text{O}$  at 303 K. Total concentration  $[\mathbf{1}+\text{Cl}] = 5$  mM. (■ =  $\text{H}\alpha$ )

Fluoride titration:  $^{19}\text{F}$  NMR experiments.

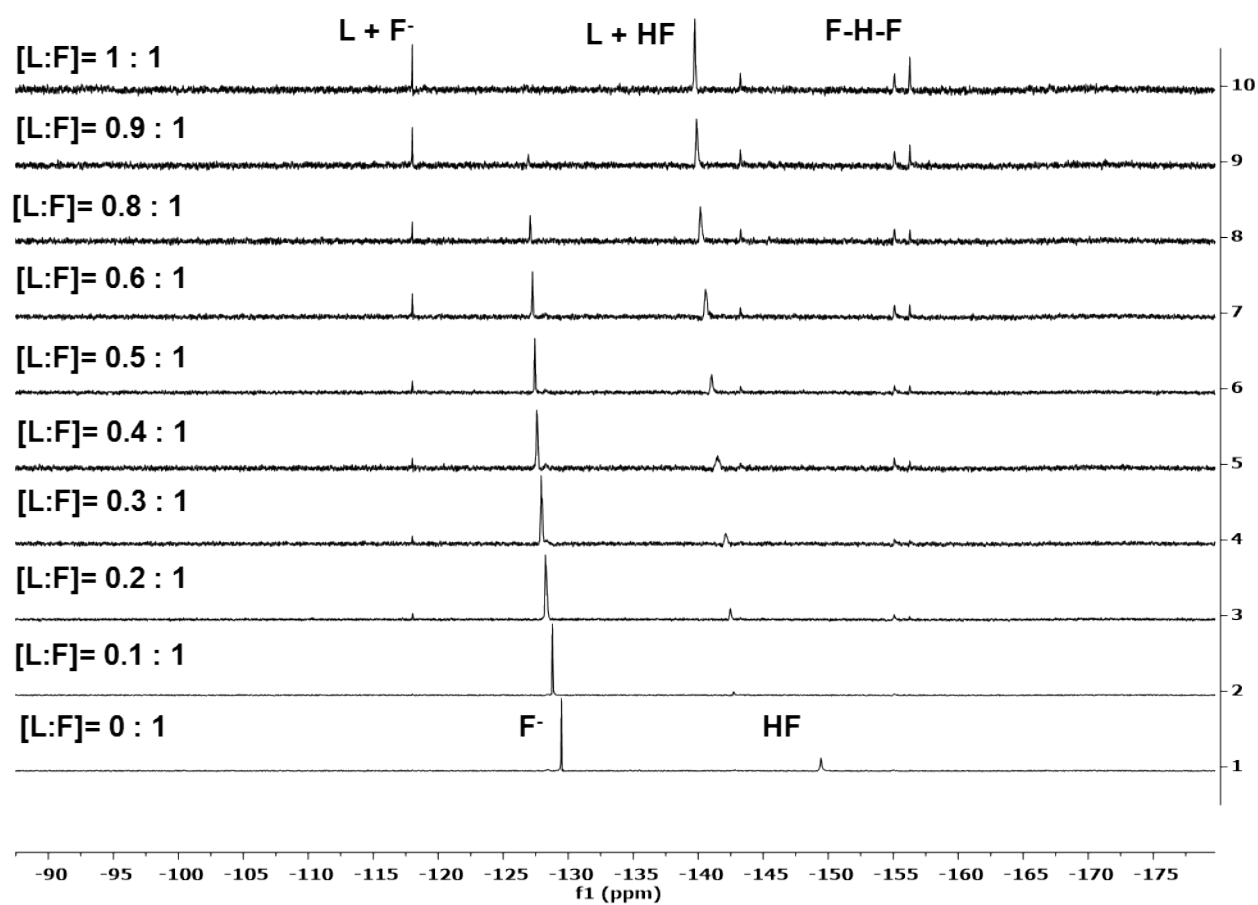

**Figure S7.**  $^{19}\text{F}$  NMR titration of **1** in the presence of  $\text{F}^-$  in  $\text{D}_2\text{O}$  at  $\text{pH}=2$ . Numbers at the left side indicate the  $1:\text{F}^-$  molar ratios.

**$^{19}\text{F}$  NMR titration of complex  $[\text{1:F}]=[\text{1:1}]$  with  $\text{Cl}^-$ .**

The study was done adding amounts of concentrated  $\text{Cl}^-$  solution to a solution that contains the complex  $[\text{1:F}]$  in 1:1 molar ratio in  $\text{D}_2\text{O}$  at pH 2. Concentration of **1** and  $\text{F}^-$  and pH were maintained during the study.

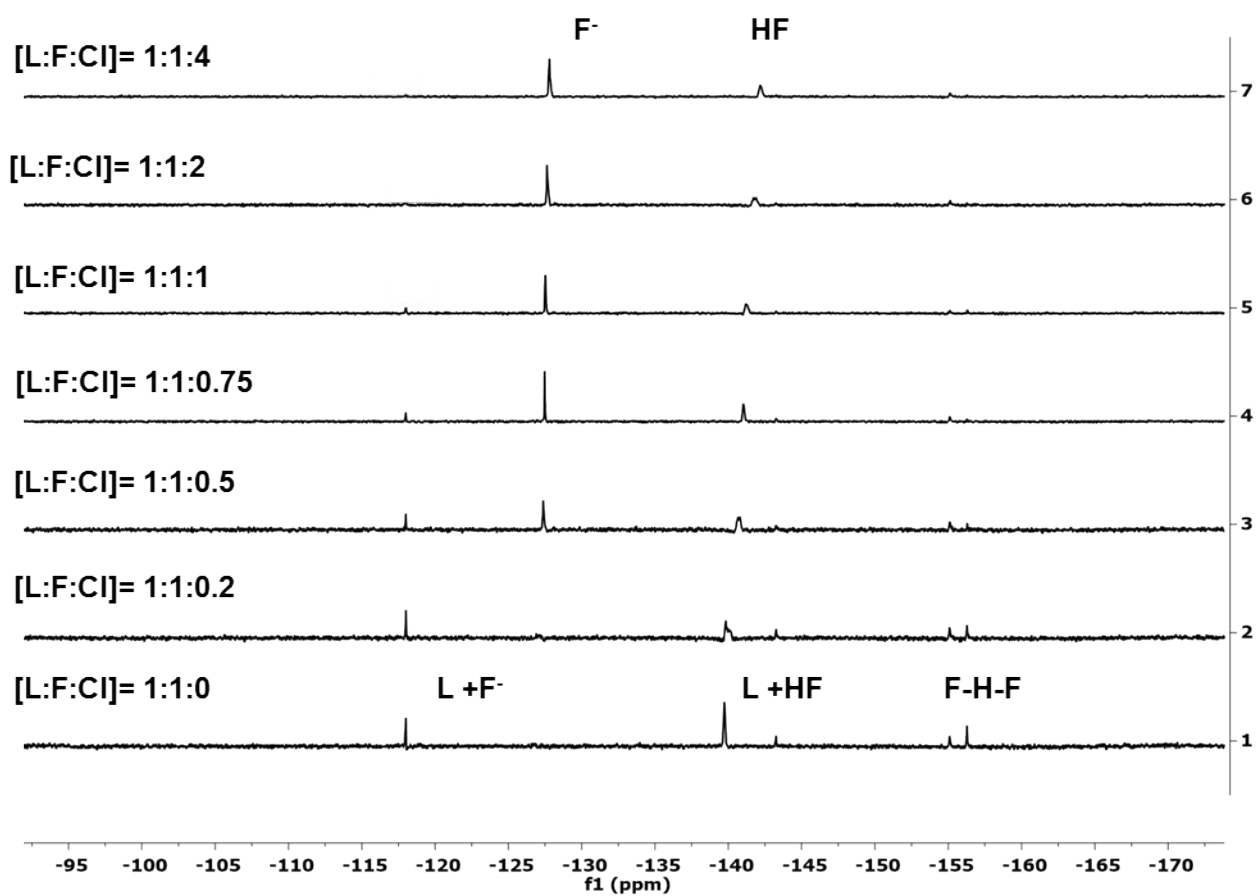

**Figure S8.**  $^{19}\text{F}$  NMR titration of the complex  $[\text{1:F}]$  (in 1:1 molar ratio) in the presence of  $\text{Cl}^-$  in  $\text{D}_2\text{O}$  at pH=2. Numbers at the left side indicate the  $1:\text{F}:\text{Cl}^-$  molar ratios.

## MALDI-TOF spectrometry

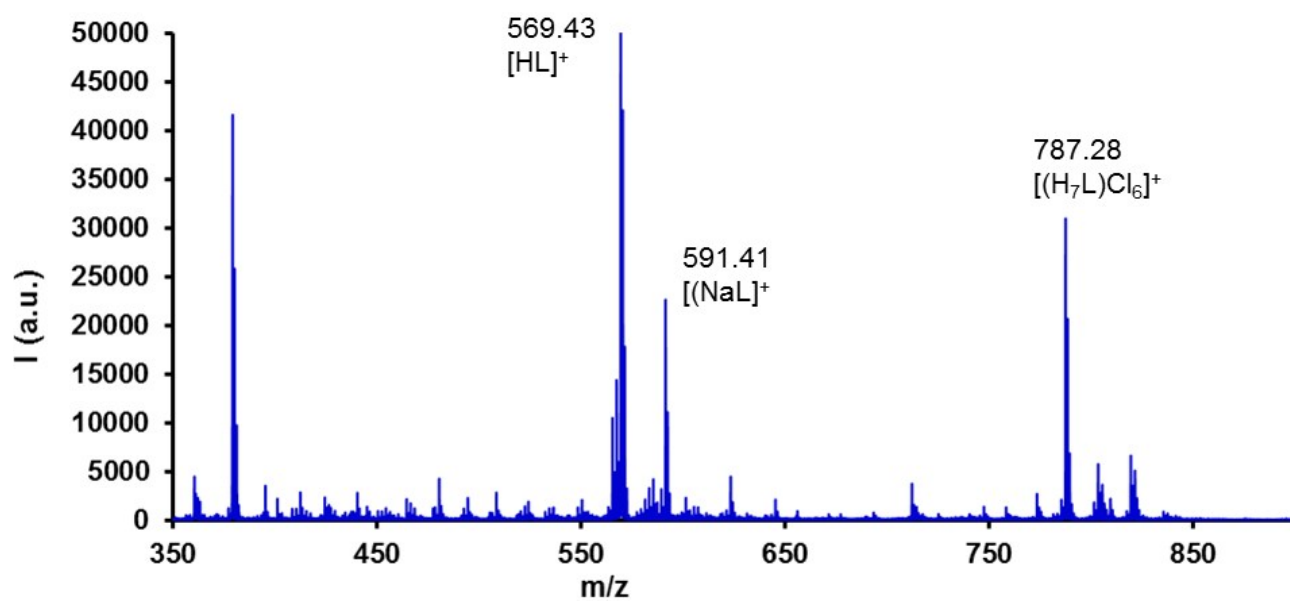

**Figure S9.** MALDI-TOF spectrum of aqueous solution of **4** at pH =2.

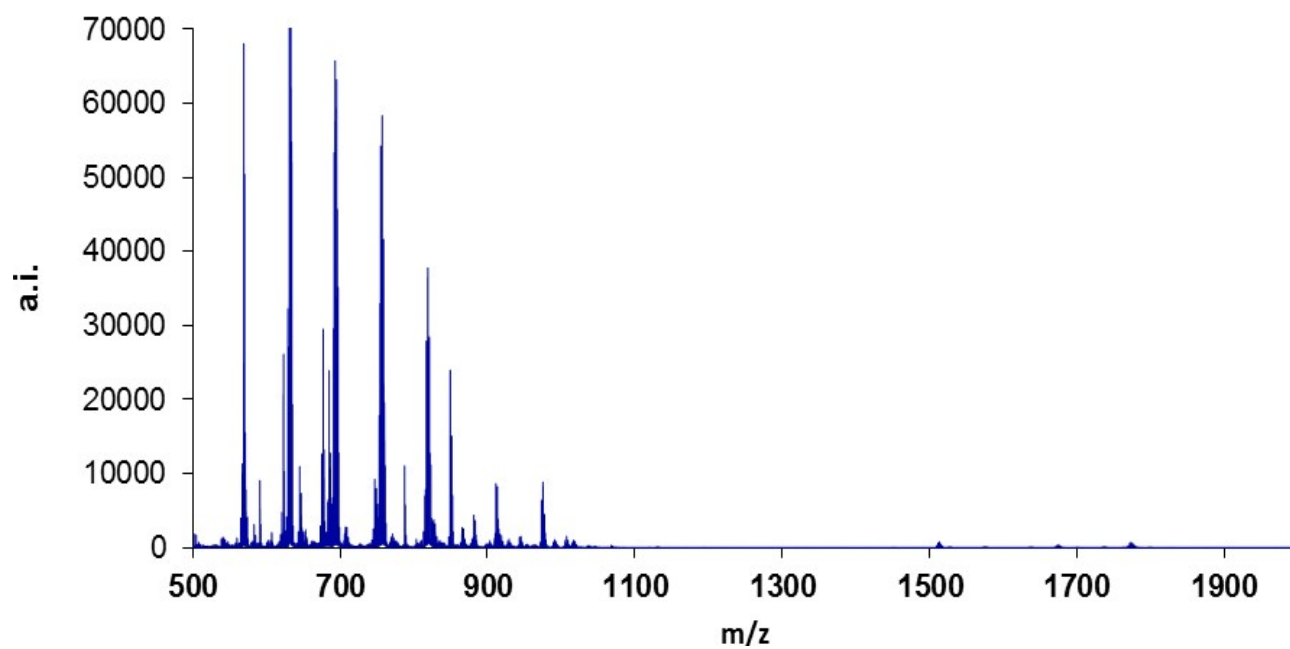

**Figure S10.** MALDI-TOF spectrum of aqueous solution of **5** at pH =1.5.

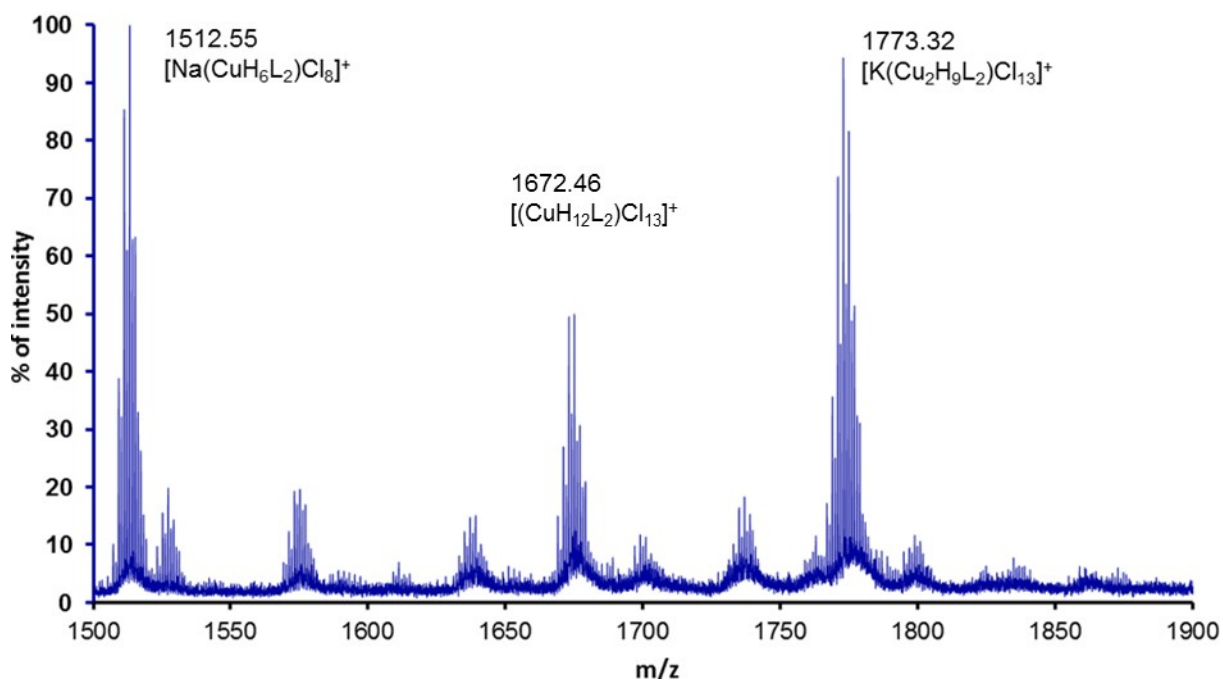

**Figure S11.** MALDI-TOF spectrum of **5** in the  $m/z = 1500 - 1850$  range.

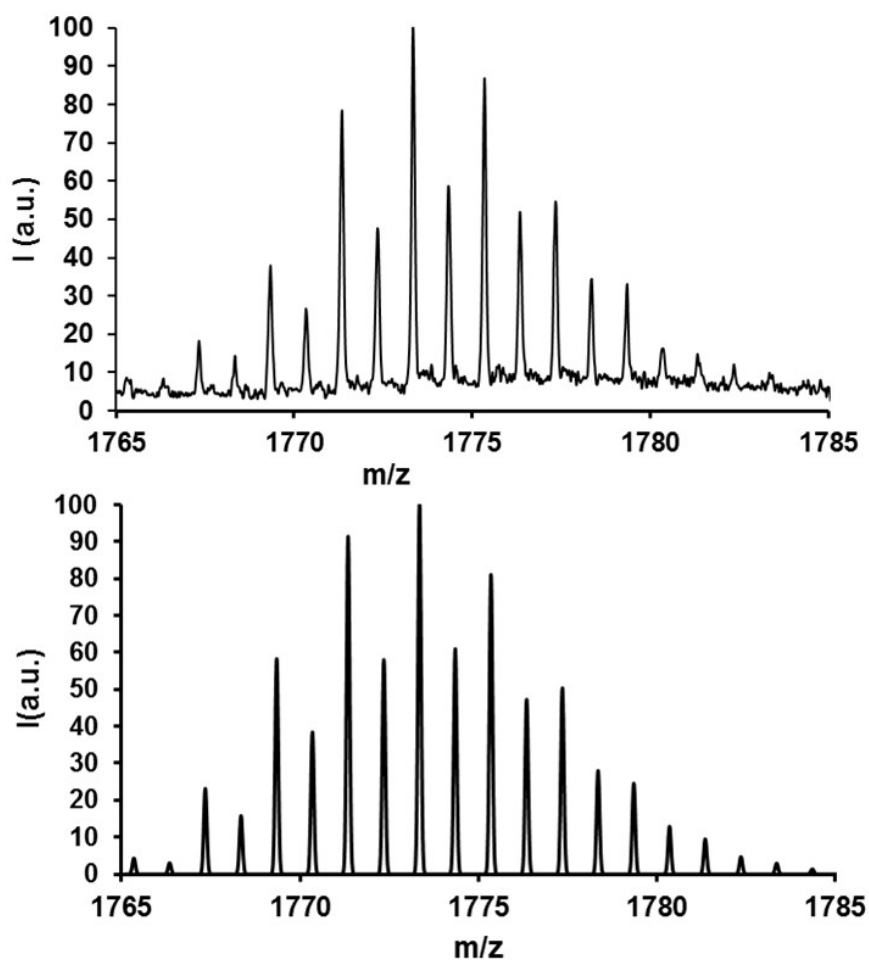

**Figure S12.** Simulated (top) and experimental (bottom) MALDI-TOF spectrum of peaks for [K(Cu<sub>2</sub>H<sub>9</sub>L<sub>2</sub>)Cl<sub>13</sub>]<sup>+</sup>.

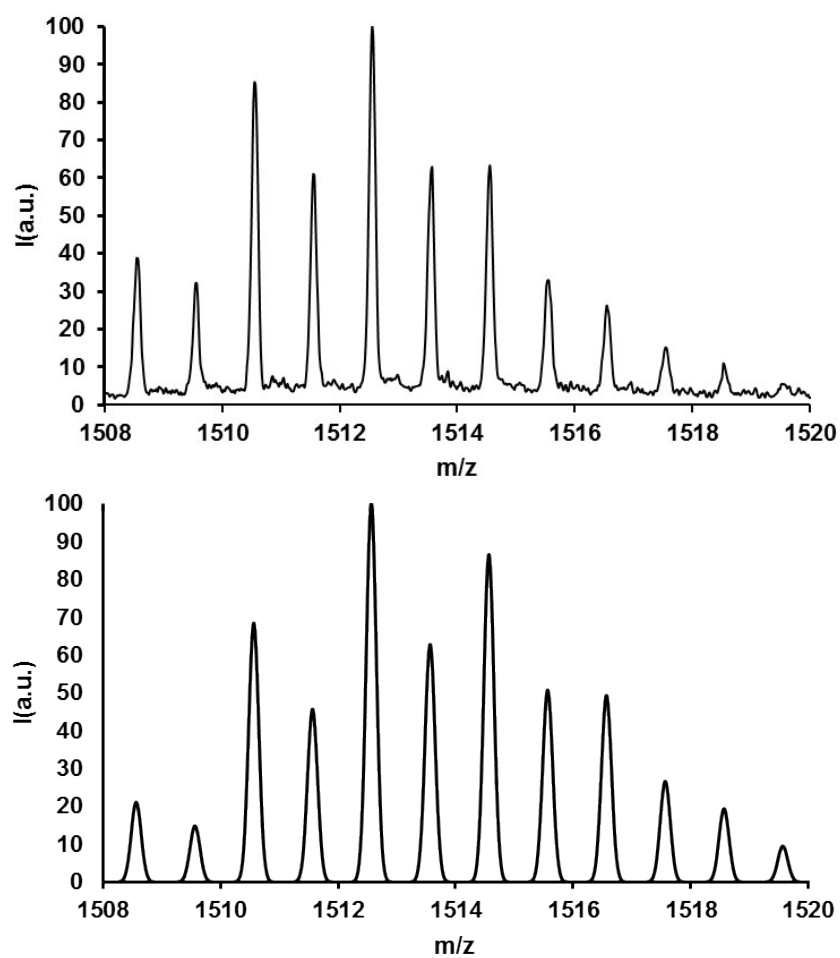

**Figure S13.** Simulated (top) and experimental (bottom) MALDI-TOF spectrum of peaks for  $[\text{Na}(\text{Cu}_2\text{H}_6\text{L}_2)\text{Cl}_8]^+$ .



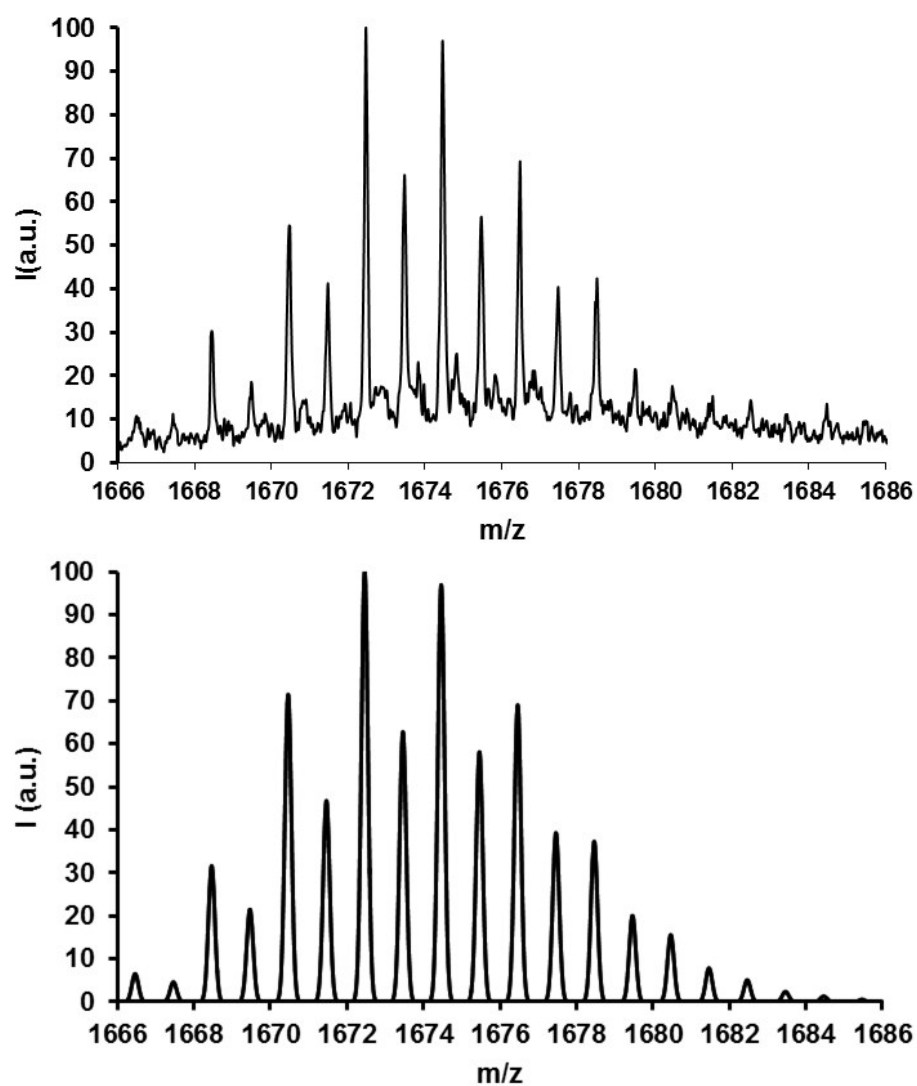

**Figure S14.** Simulated (top) and experimental (bottom) MALDI-TOF spectrum of peaks for  $[(\text{Cu}_2\text{H}_{12}\text{L}_2)\text{Cl}_{13}]^+$ .

## Infrared Spectra.

Infrared spectra of solids were recorded in the region 400 - 4000  $\text{cm}^{-1}$  on a Nicolet NICOLET 5700 Fourier-Transform Infrared Spectrophotometer using KBr pellets.

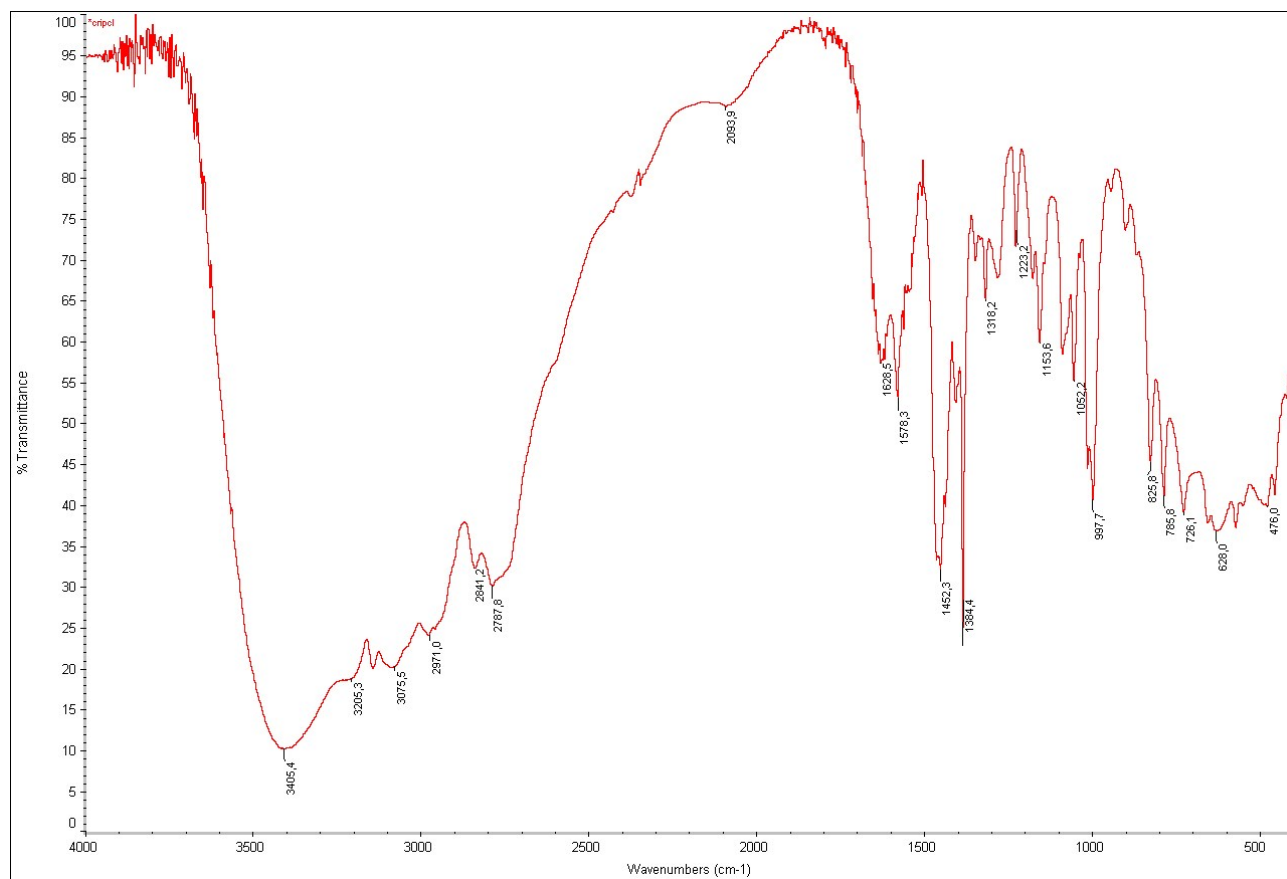

**Figure S15.** IR spectrum of **4** in KBr.

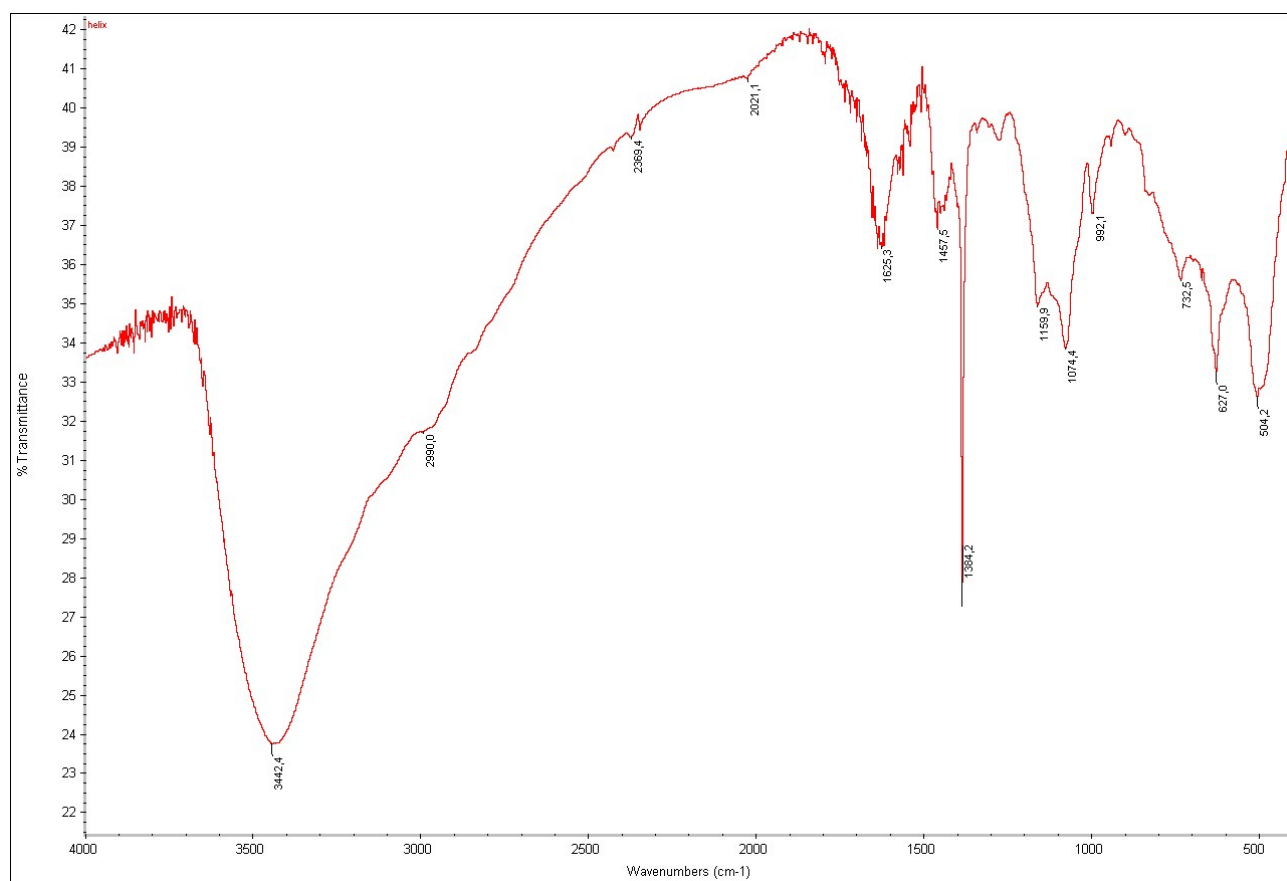

**Figure S16.** IR spectrum of **5** in KBr.

### Thermal decomposition (TG) analysis.

Thermal decomposition (TG) analysis was obtained by a model (TG-DTA) Pyris Diamond, PerkinElmer. The experiment was performed in air atmosphere at a heating rate of  $5^{\circ}\text{C min}^{-1}$  in the temperature range  $30^{\circ}\text{C}$  -  $800^{\circ}\text{C}$ .

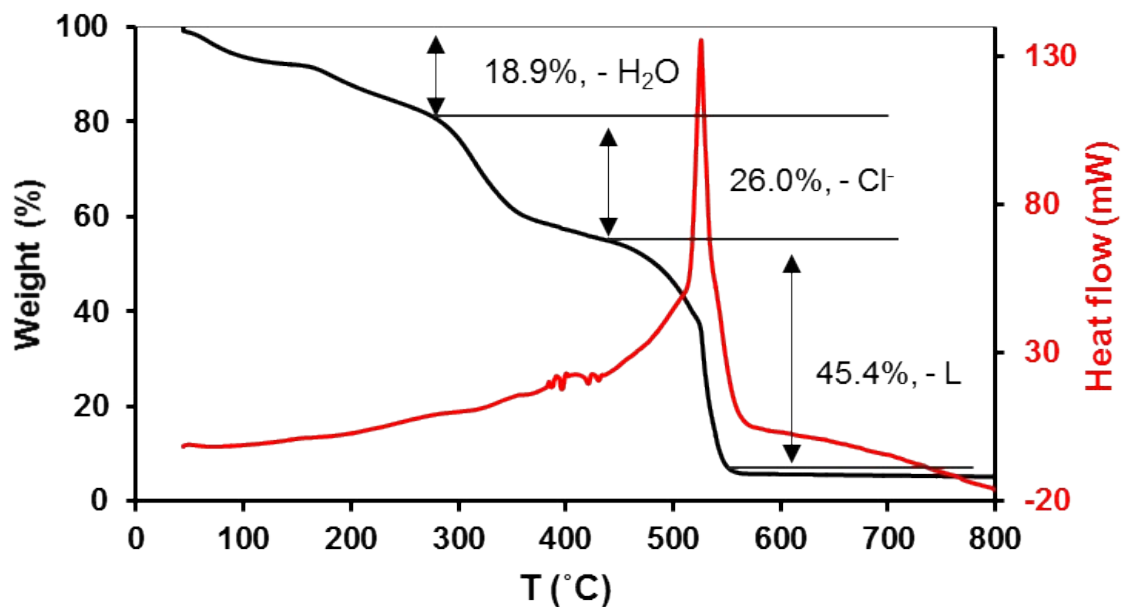

**Figure S17.** Thermogravimetric analysis (TGA) (black) and Differential thermal analysis (DTA) (red) of **5**.

## **References**

- [1] L. Lamarque, P. Navarro, C. Miranda, V. J. Arán, C. Ochoa, F. Escartí, E. García-España, J. Latorre, S. V Luis and J. F. Miravet, *J. Am. Chem. Soc.* 2001, **123**, 10560.
- [2] C. Giacovazzo, *J. Appl. Cryst.*, 1999, **32**, 115.
- [3] G. M. Sheldrick, *Acta Cryst. A*, 2008, **64**, 112.
- [4] O. V. Dolomanov, L. J. Bourhis, R. J. Gildea, J. A. K. Howard and H. Puschmann, *J. Appl. Cryst.*, 2009, **42**, 339.
- [5] C. F. Macrae, I. J. Bruno, J. A. Chisholm, P. R. Edgington, P. McCabe, E. Pidcock, L. Rodriguez-Monge, R. Taylor, J. van de Streek and P. A. Wood, *J. Appl. Cryst.*, 2008, **41**, 466.
- [6] E. García-España, M. J. Ballester, F. Lloret, J. M. Moratal, J. Faus and A. Bianchi, *J. Chem. Soc. Dalton Trans.* 1988, 101.
- [7] M. Fontanelli and M. Micheloni, Proceedings of the I Spanish-Italian Congress on Thermodynamics of Metal Complexes, Diputación de Castellón, Castellón, Spain, 1990.
- [8] (a) Gran, G. *Analyst (London)* 1952, **77**, 661. (b) F. J. Rossotti and H. Rossoti, H.; *J. Chem. Educ.*, 1965, **42**, 375.
- [9] P. Gans, A. Sabatini and A. Vacca, *Talanta*, 1996, **43**, 1739.
- [10] A. K. Covington, M. Paabo, R. A. Robinson and R. G. Bates, *R. G. Anal. Chem.*, 1968, **40**, 700.
